# Supplementary material
Source: PubMed Central journal article supplement (PMC4974355)

# Supplemental Figure 1

**A**

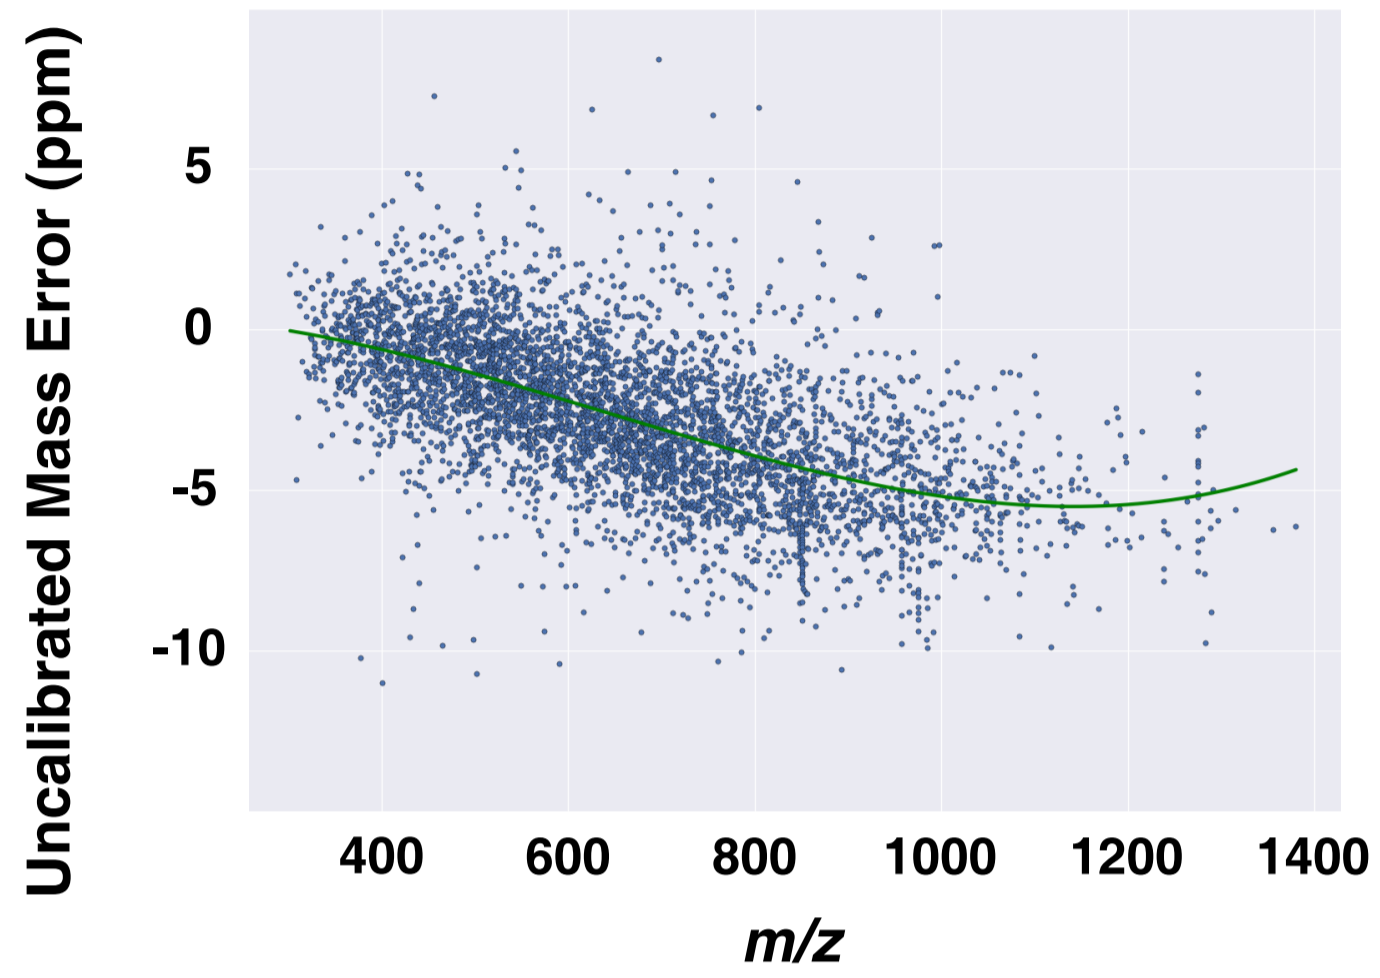

**B**

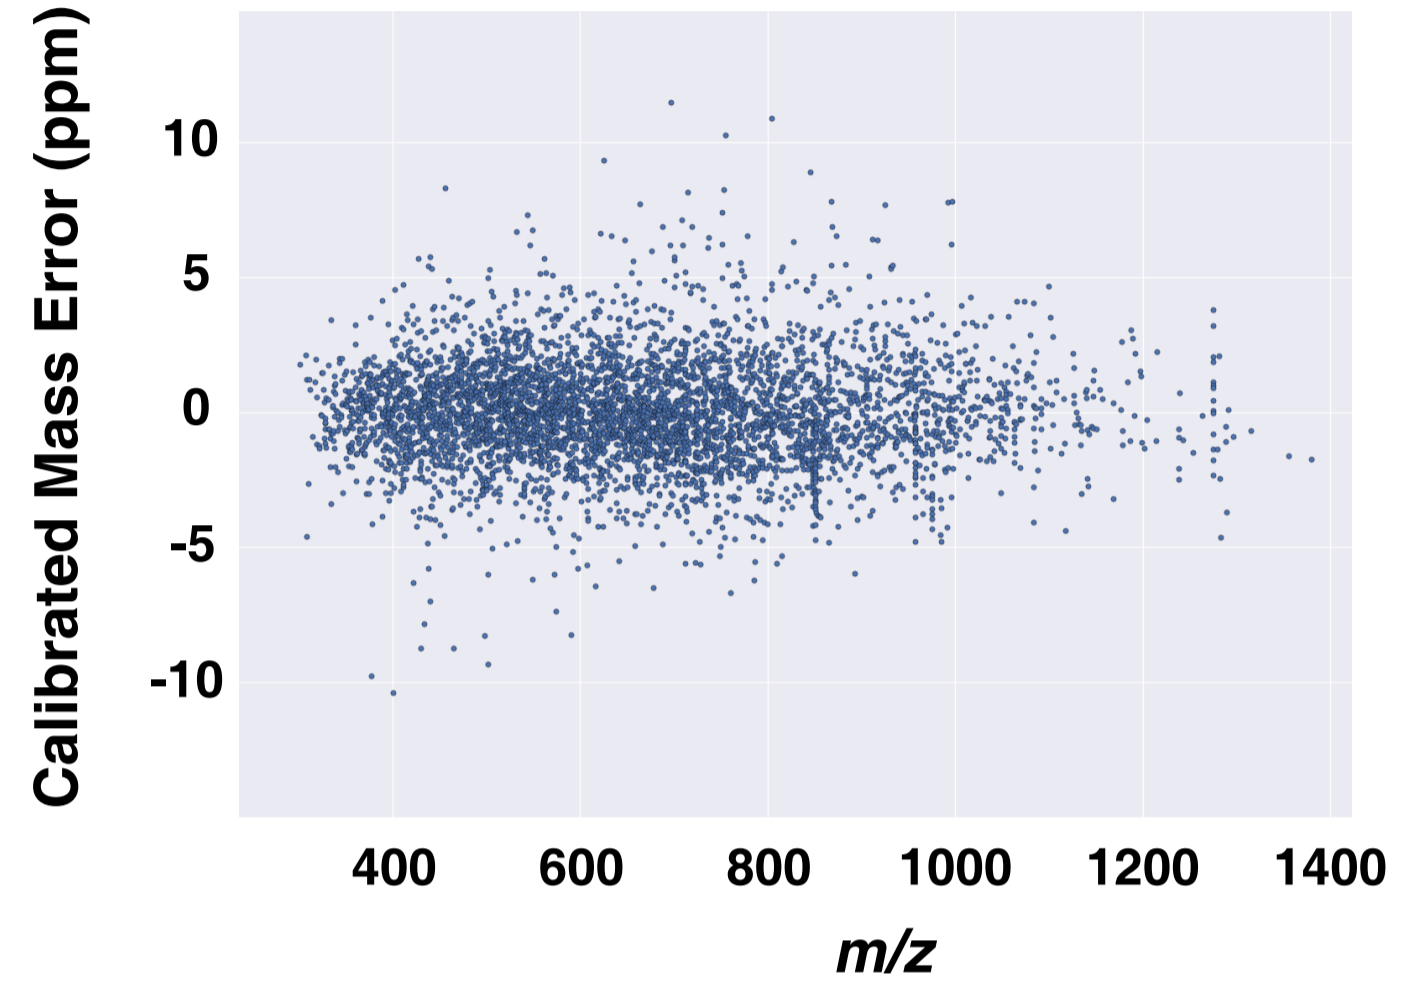

Supplement: 10.1074_O115.056879_mcp.O115.056879-1.pdf [file 10.1074_O115.056879_mcp.O115.056879-1.pdf]

# Supplemental Figure 2

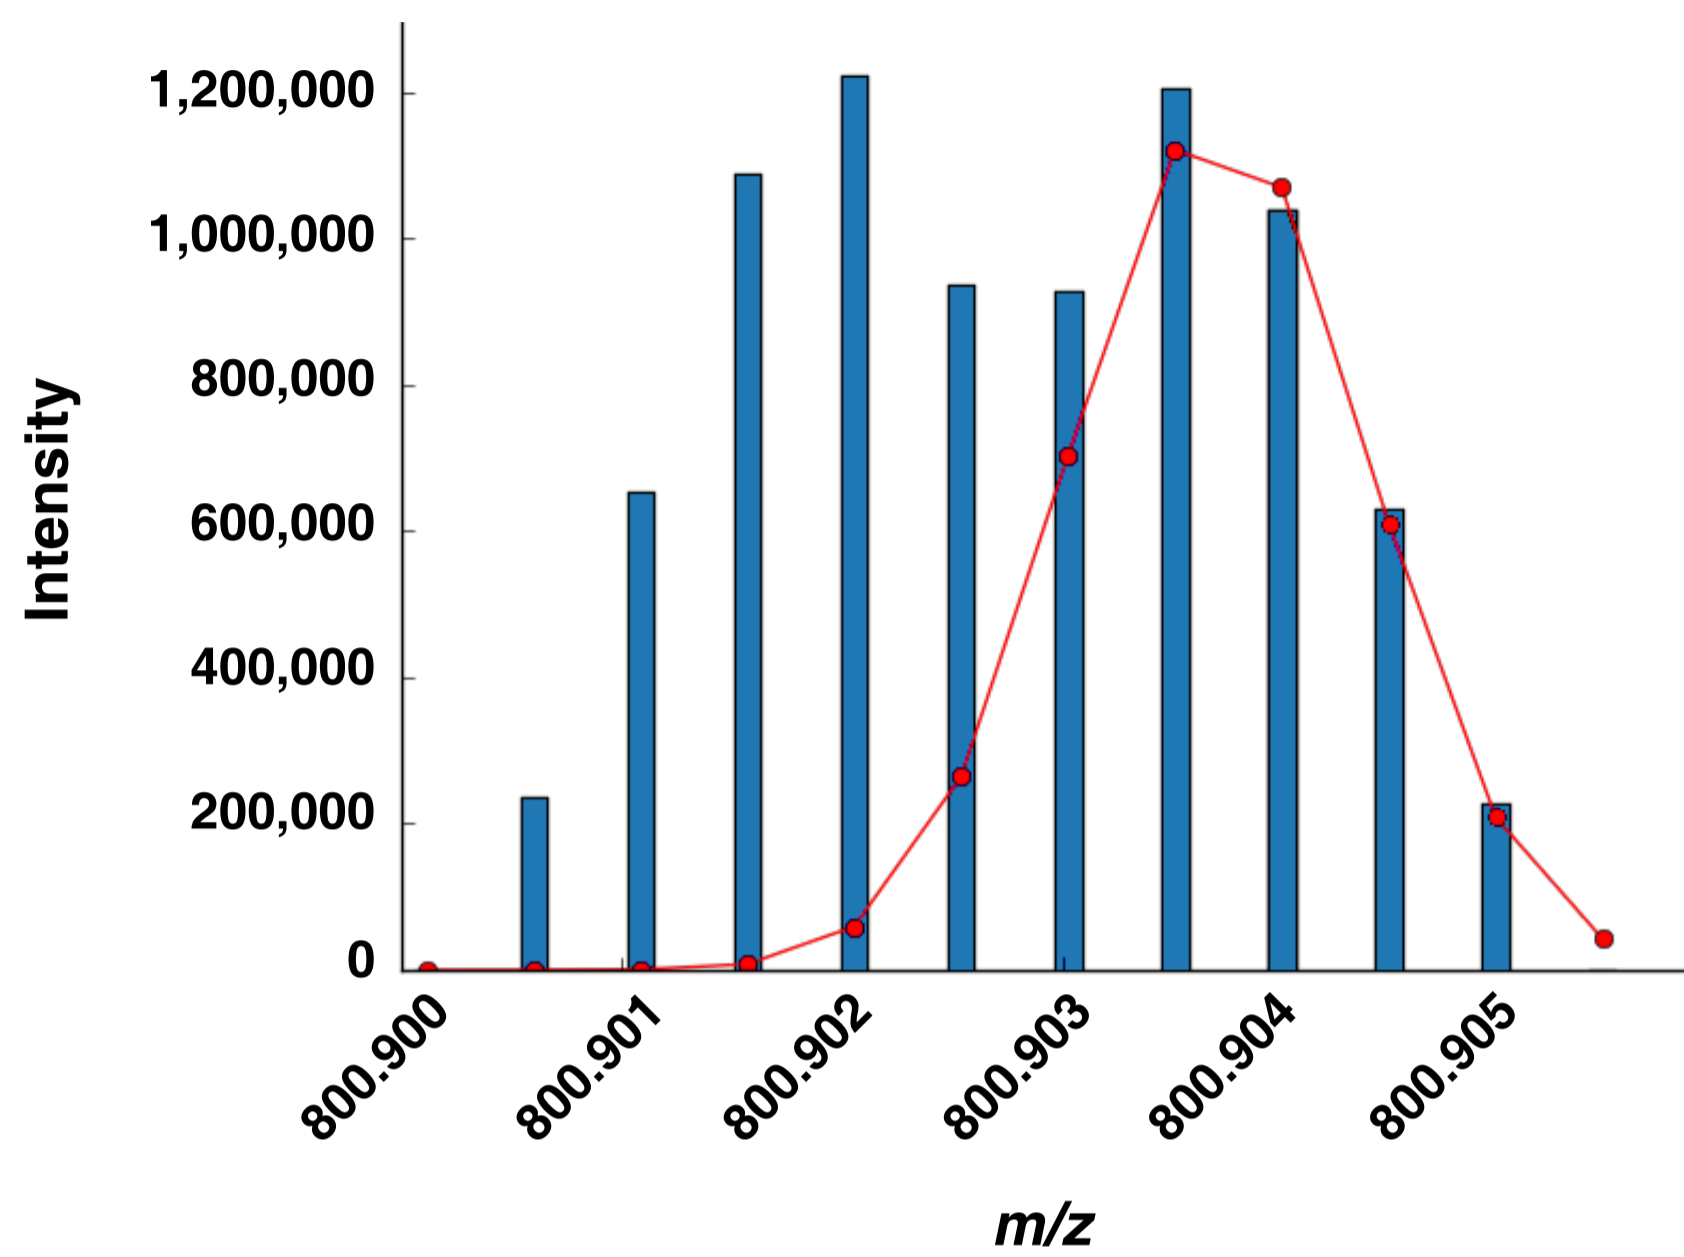

Supplement: 10.1074_O115.056879_mcp.O115.056879-2.pdf [file 10.1074_O115.056879_mcp.O115.056879-2.pdf]

# Supplemental Figure 3

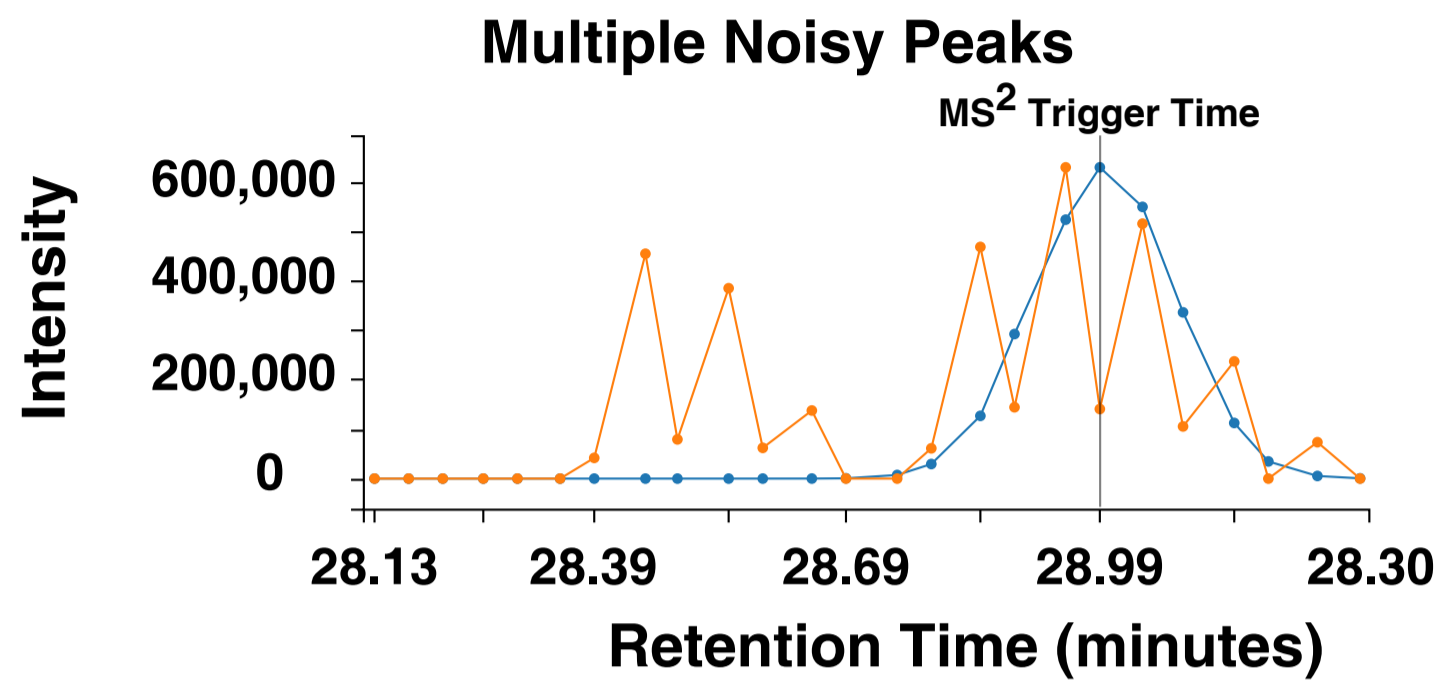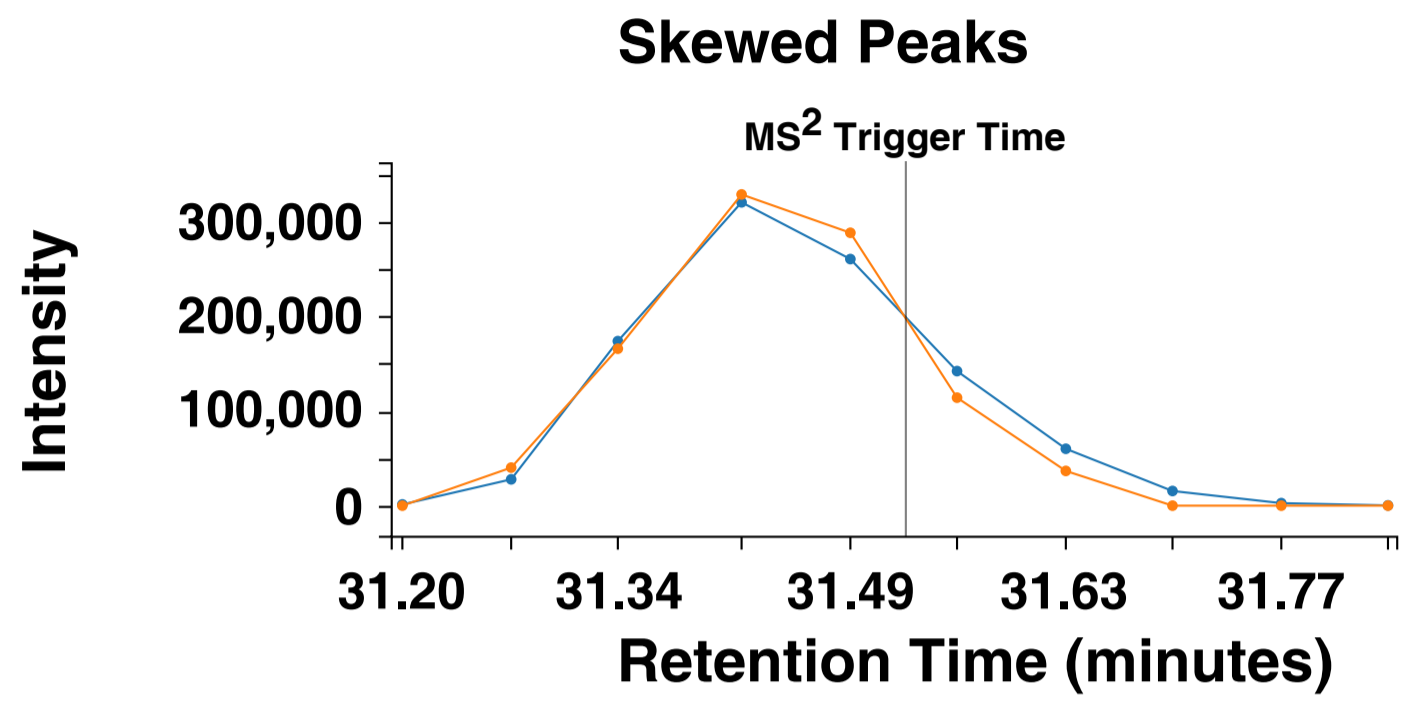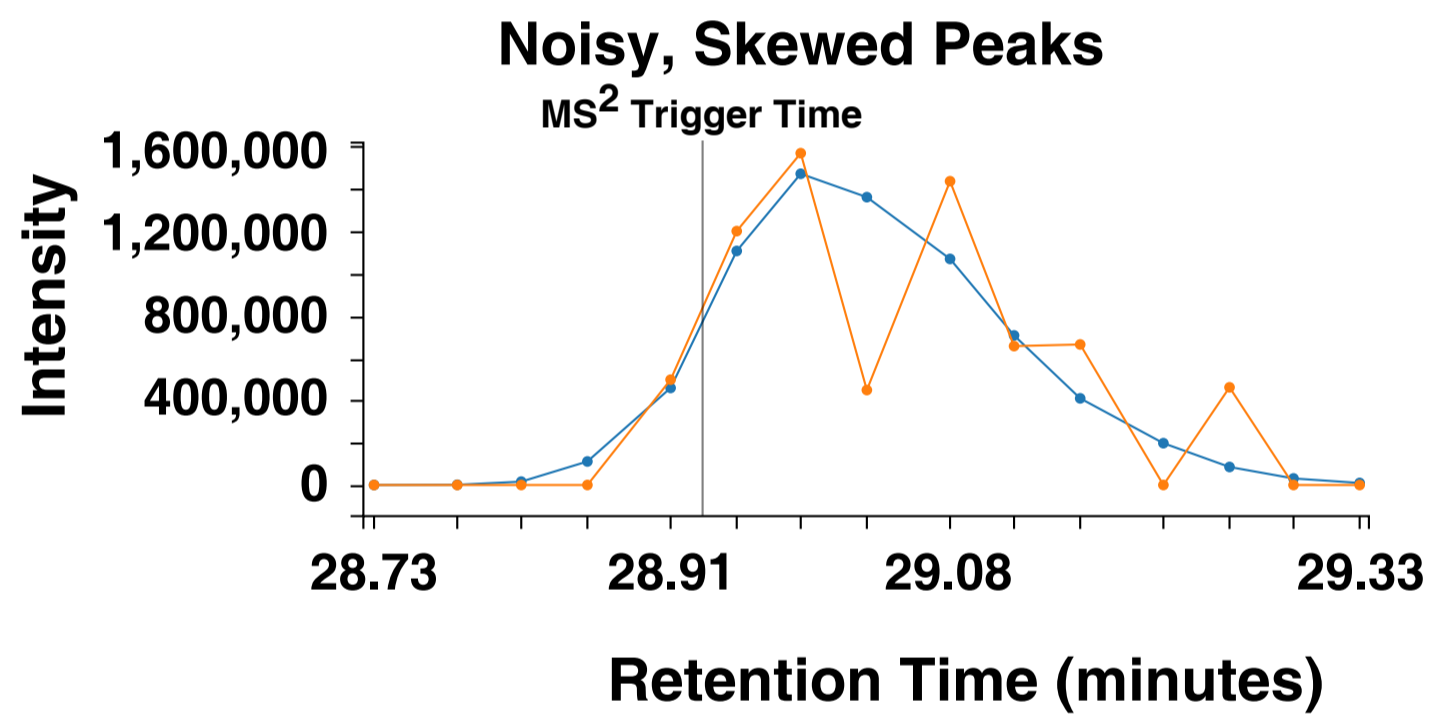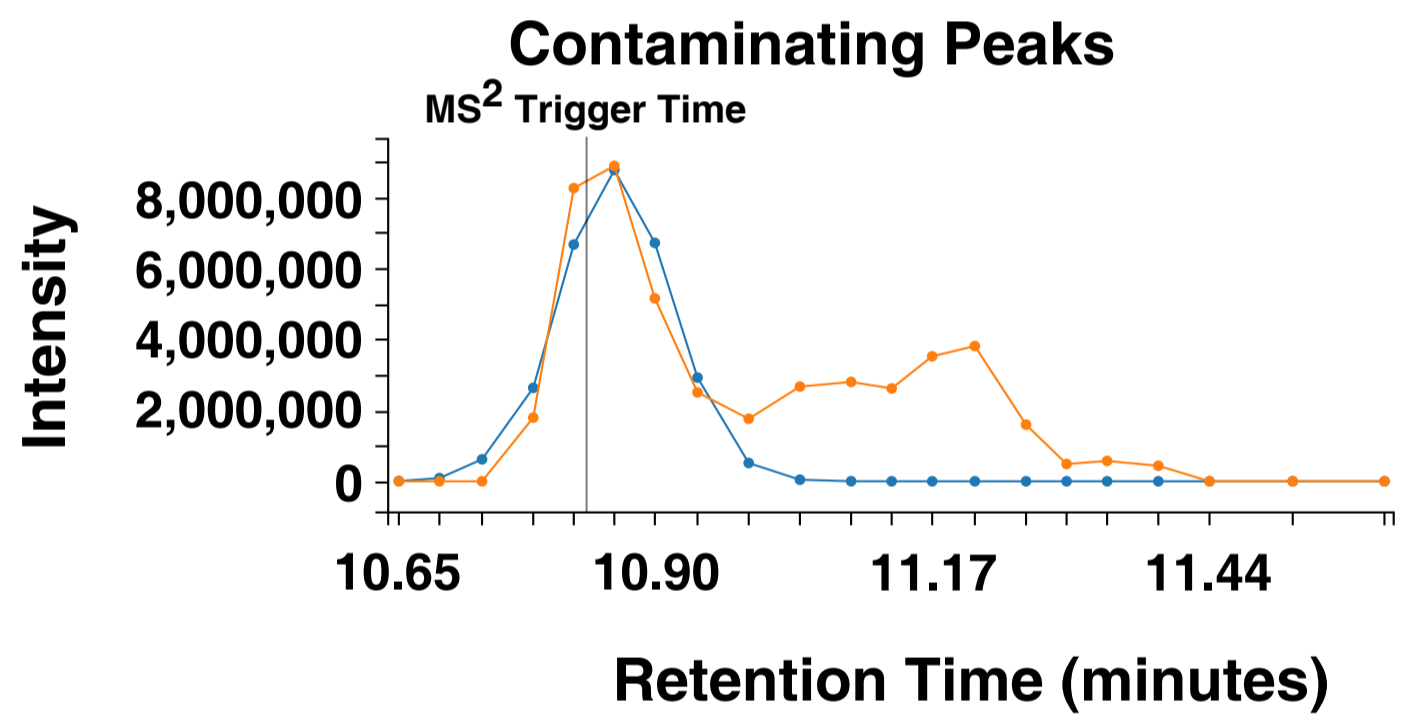

Supplement: 10.1074_O115.056879_mcp.O115.056879-3.pdf [file 10.1074_O115.056879_mcp.O115.056879-3.pdf]

**A**

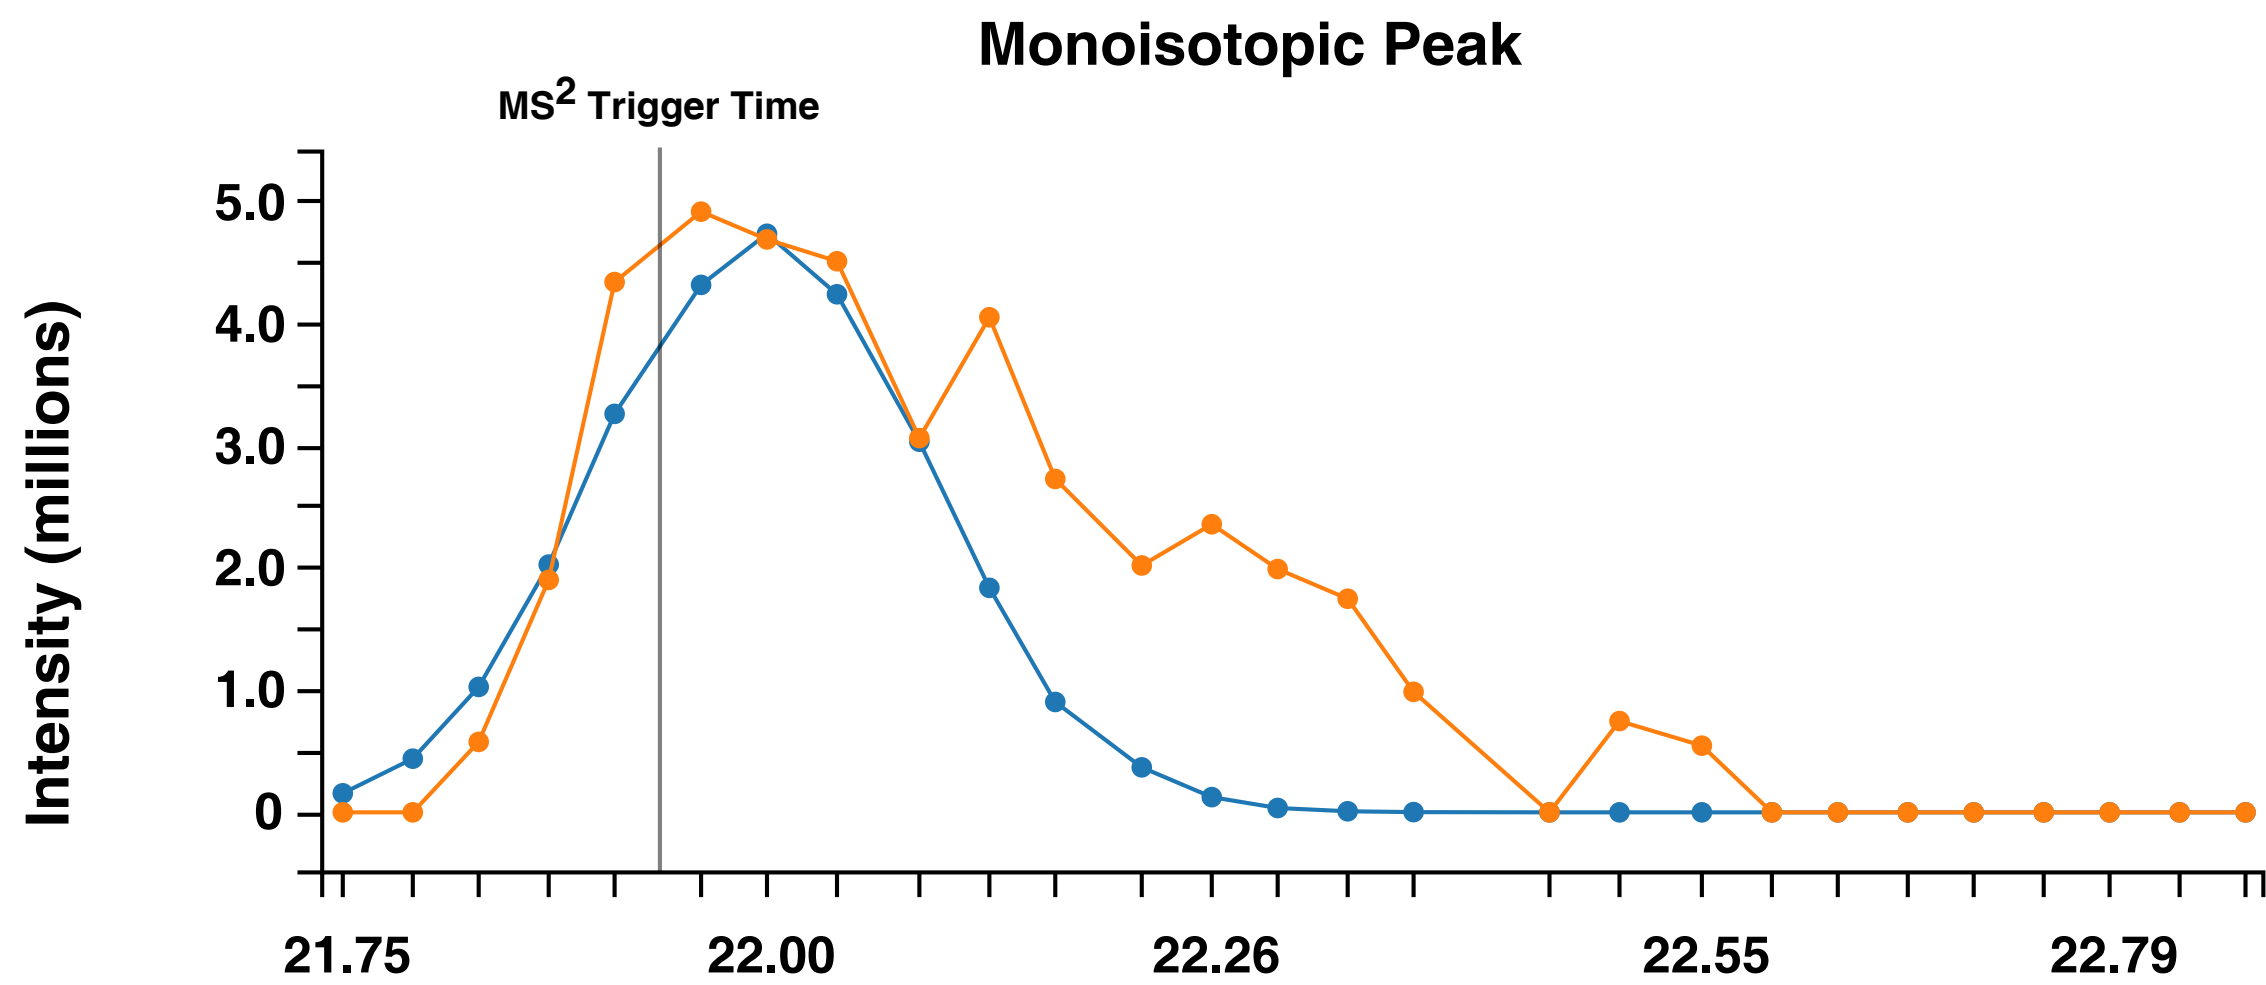

**B**

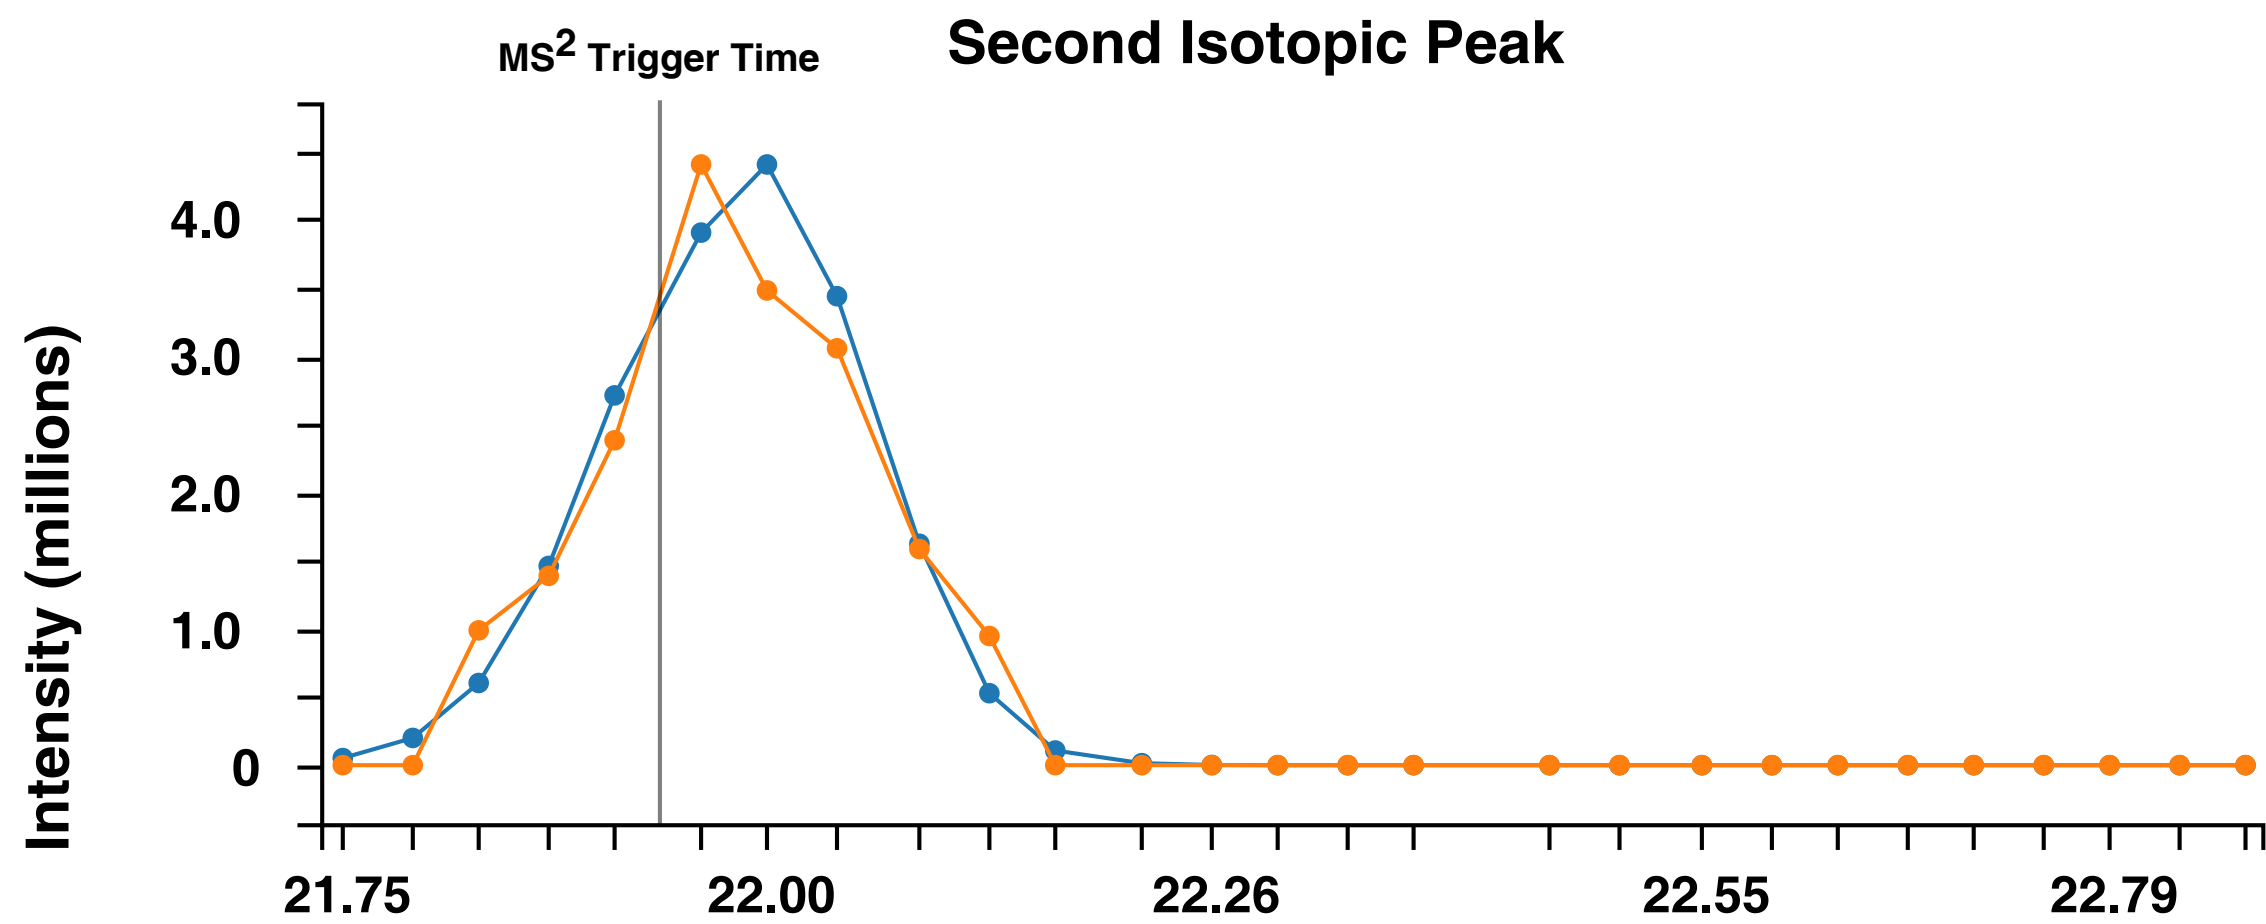

**C**

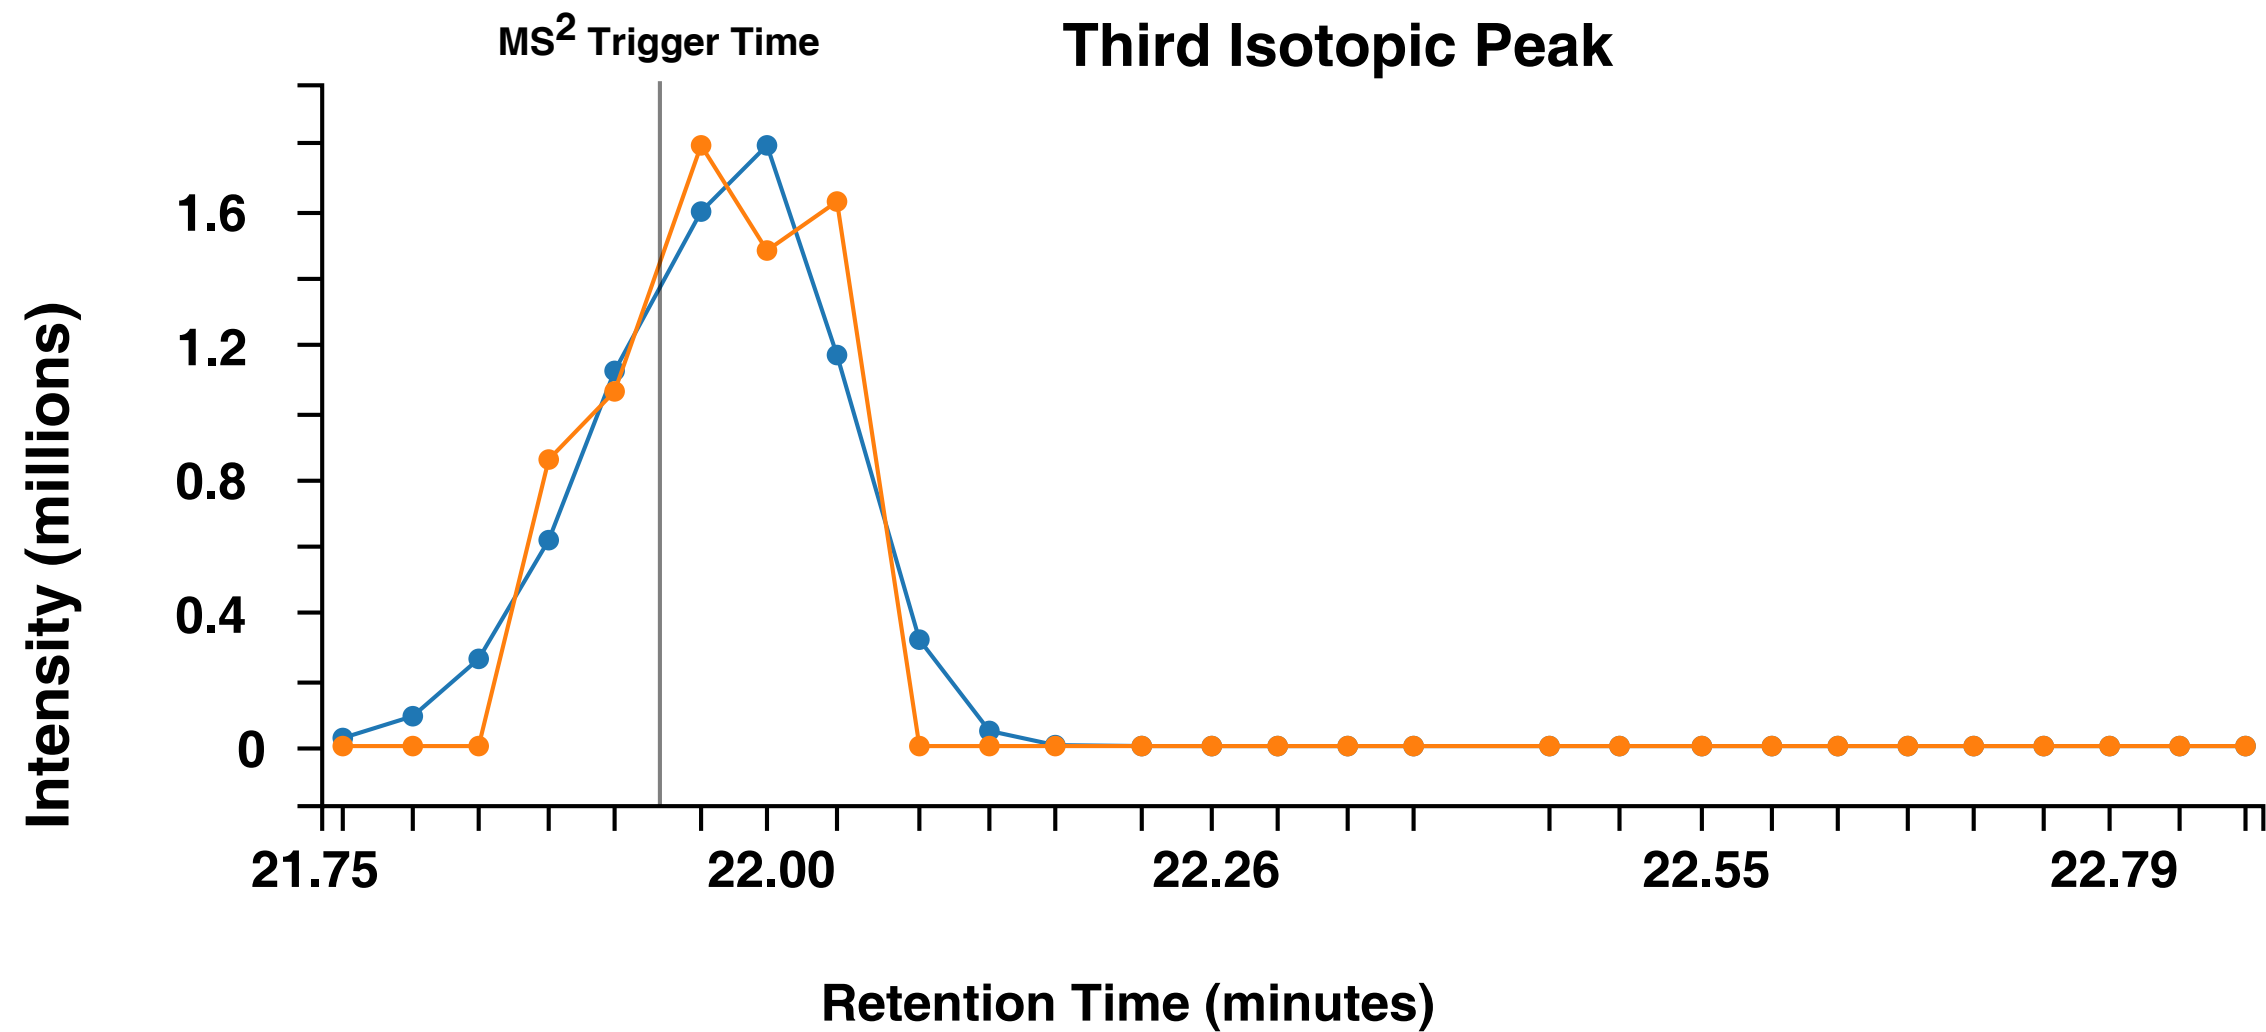

Supplement: 10.1074_O115.056879_mcp.O115.056879-4.pdf [file 10.1074_O115.056879_mcp.O115.056879-4.pdf]

# Supplemental Figure 5

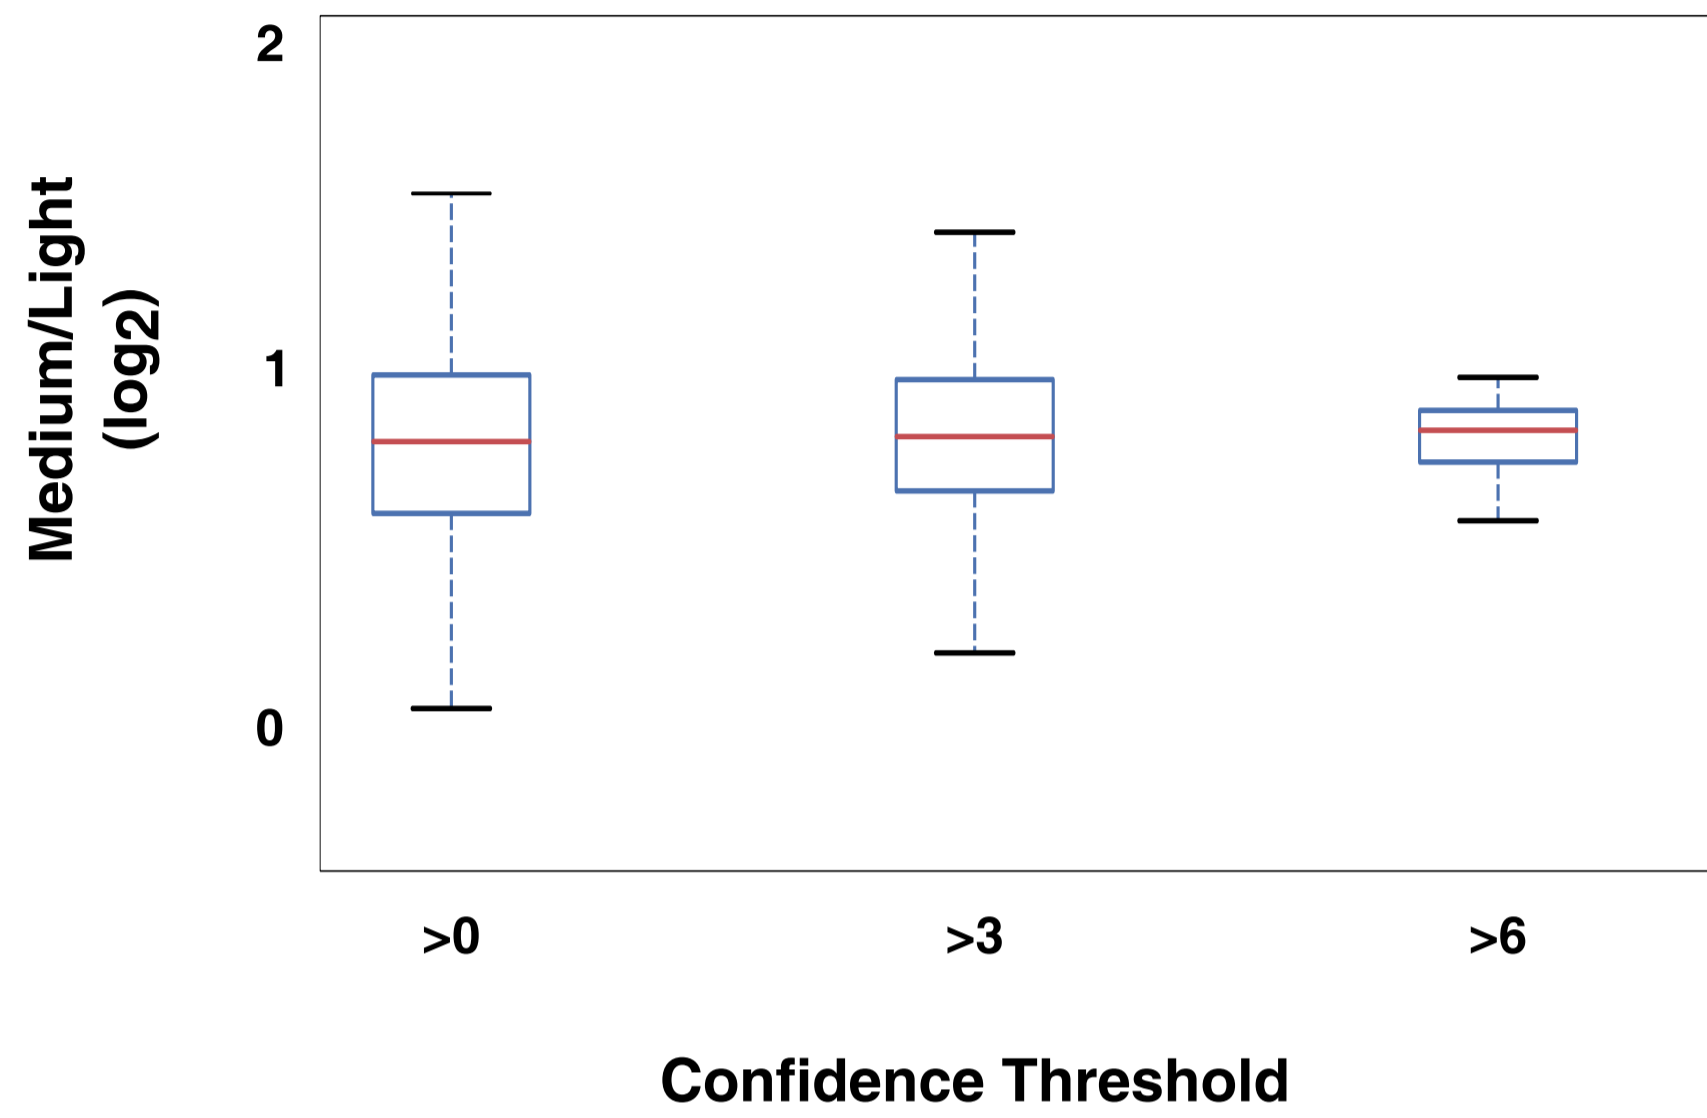

Supplement: 10.1074_O115.056879_mcp.O115.056879-5.pdf [file 10.1074_O115.056879_mcp.O115.056879-5.pdf]

# Supplemental Figure 6

**A**

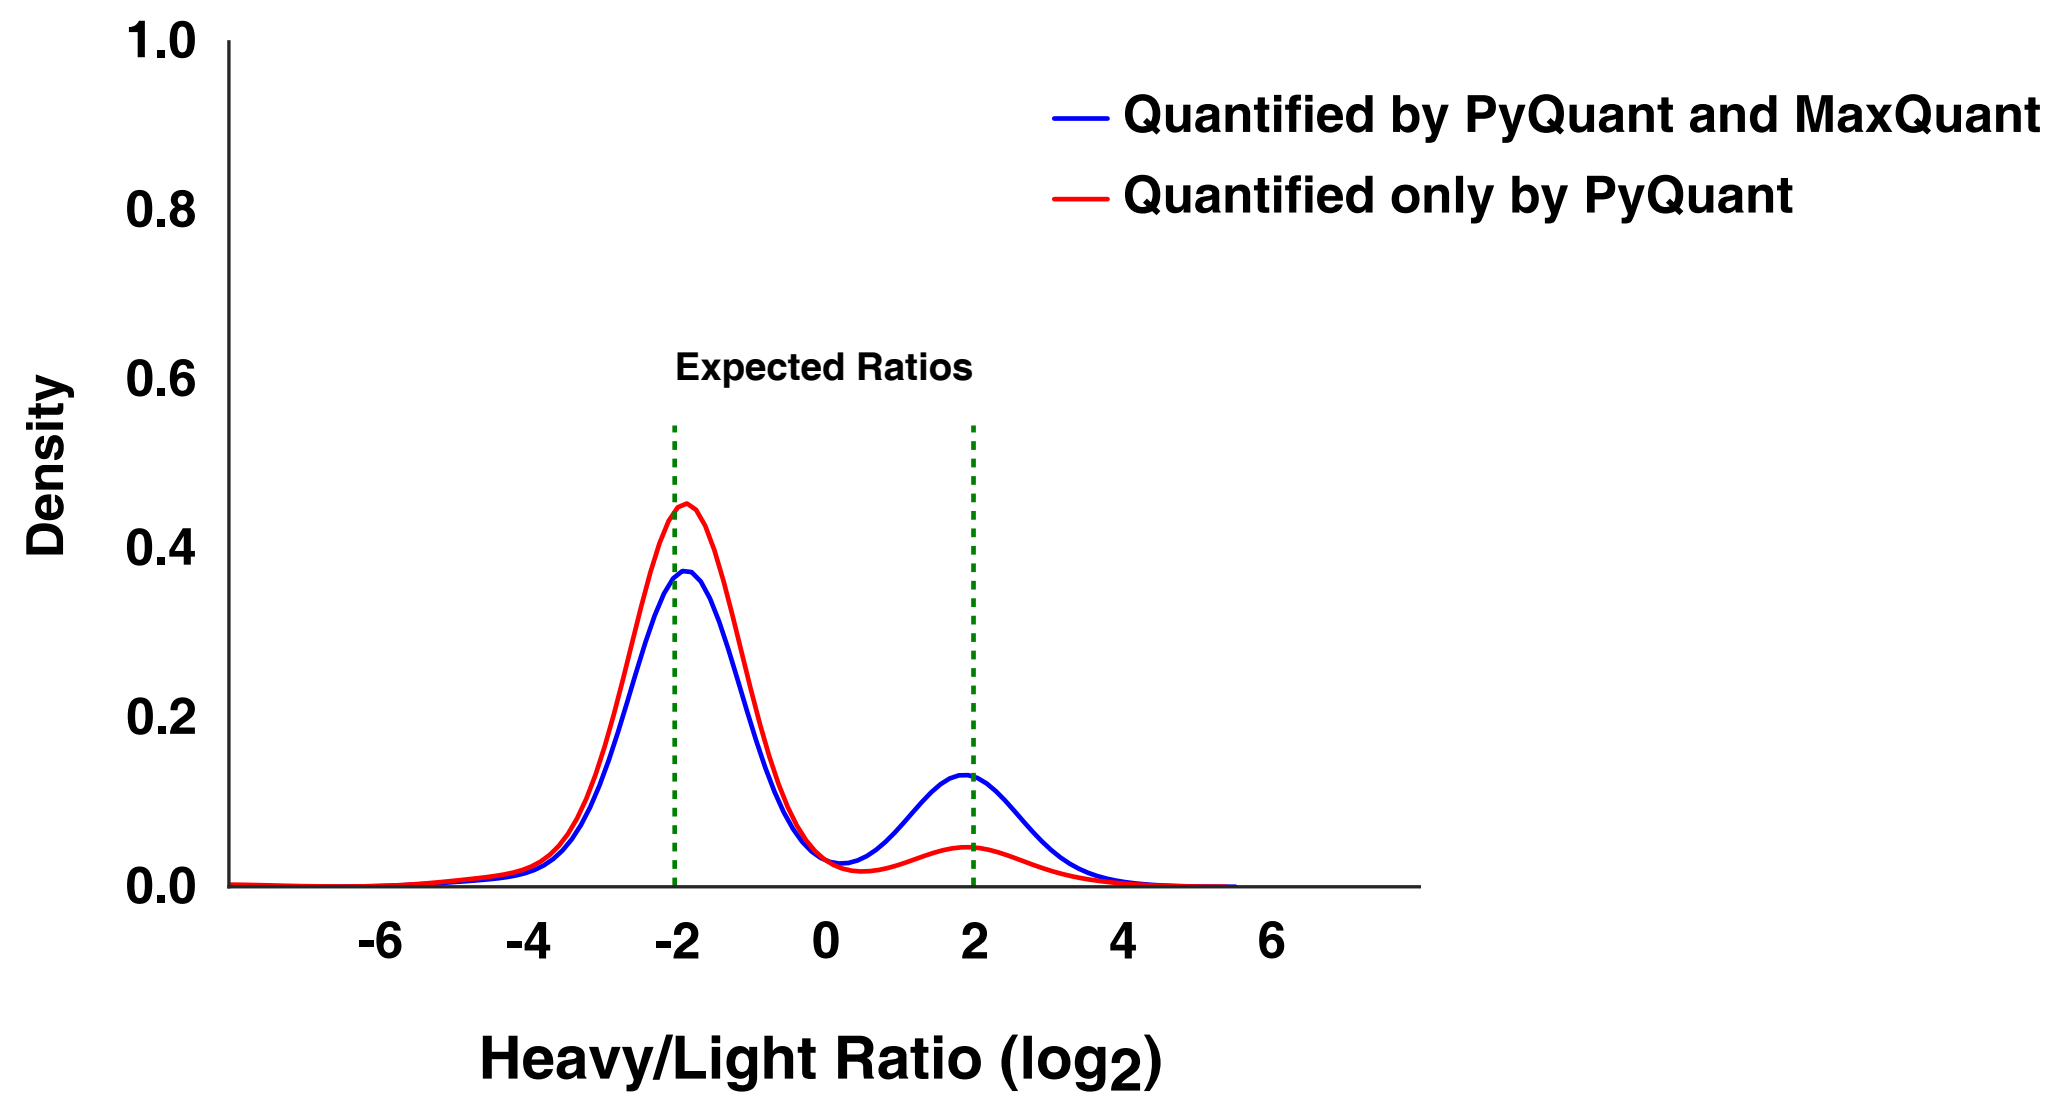

**B**

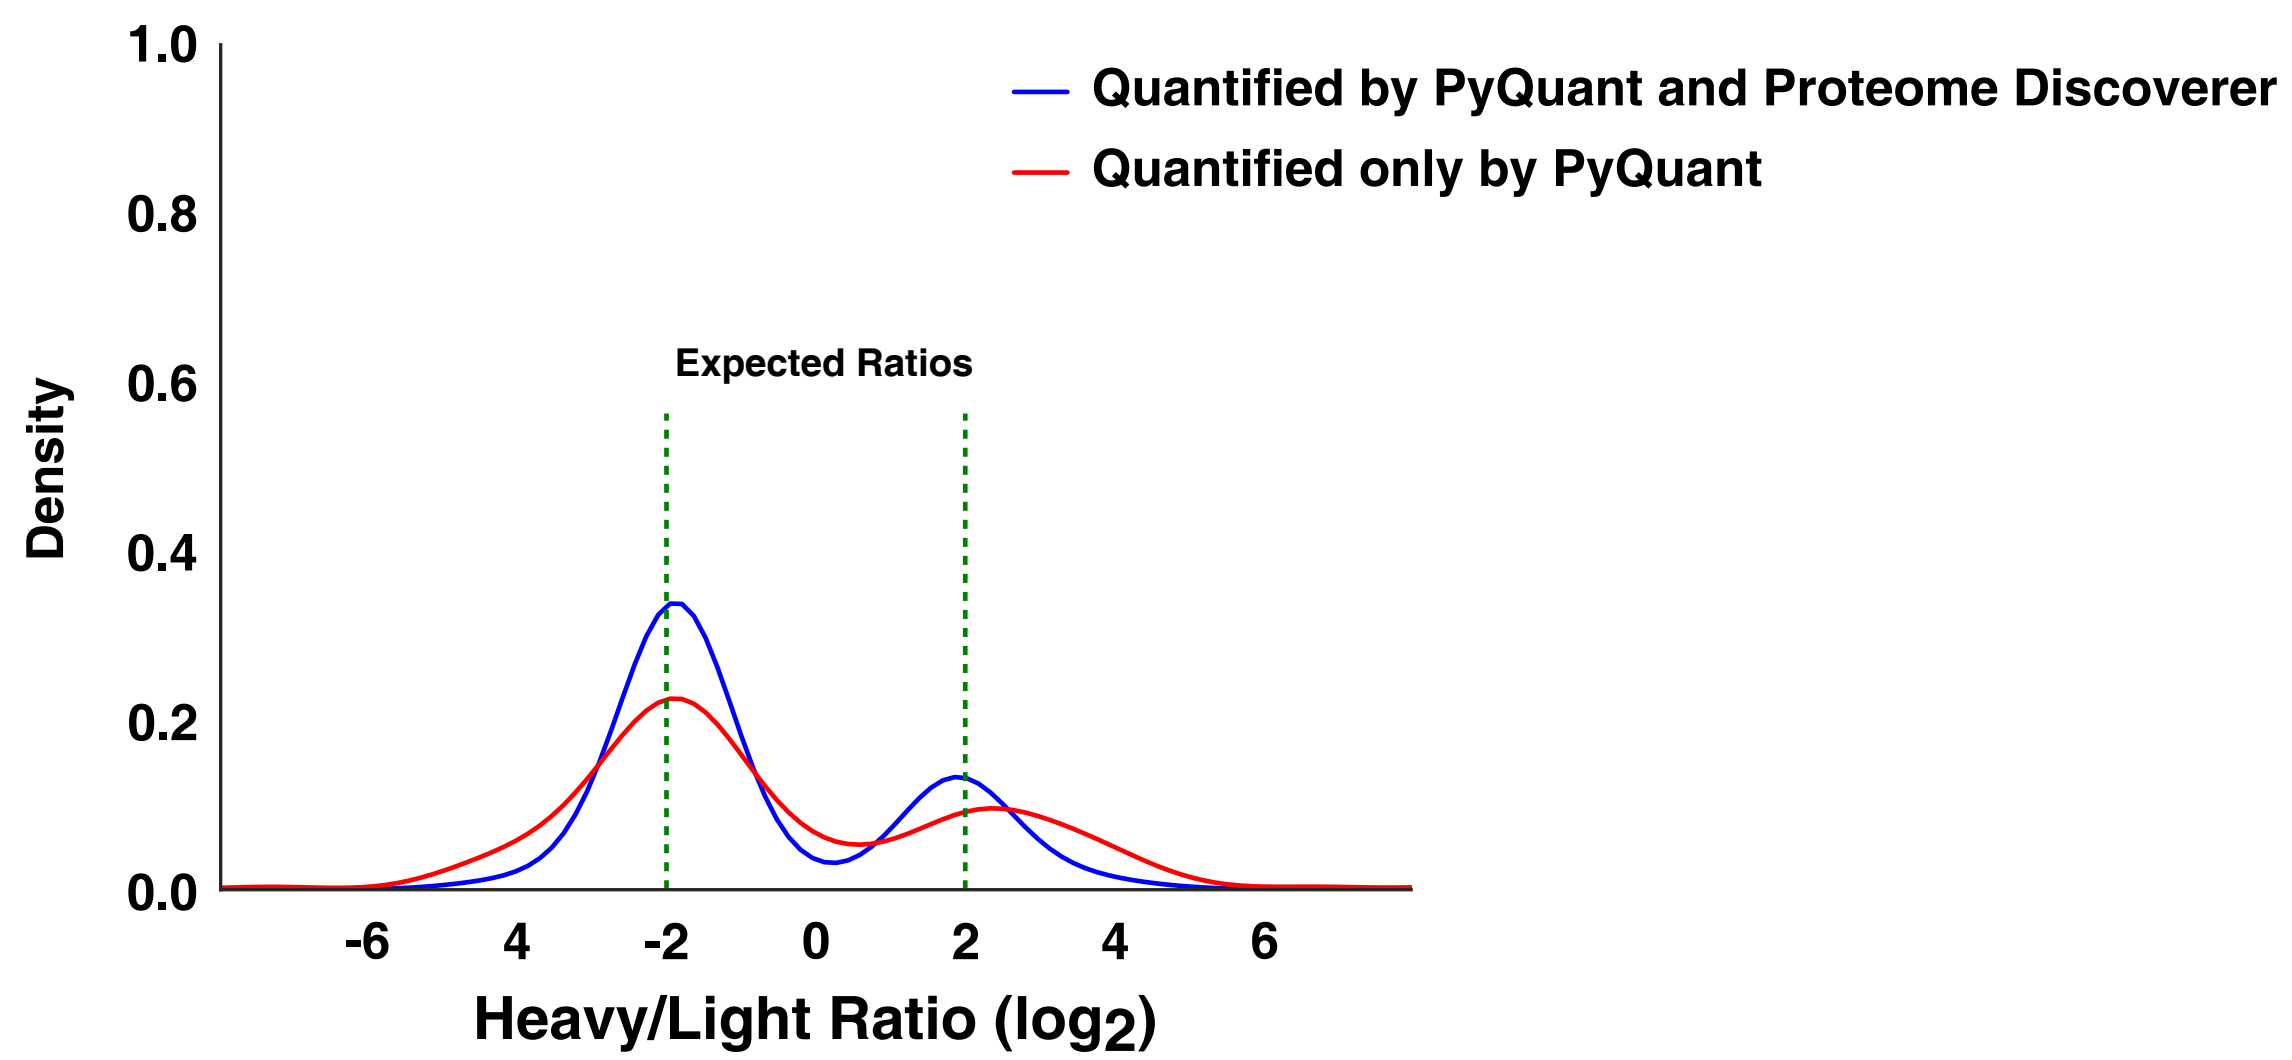

Supplement: 10.1074_O115.056879_mcp.O115.056879-6.pdf [file 10.1074_O115.056879_mcp.O115.056879-6.pdf]
